# Supplementary material for: An indirect Raman spectroscopy method for the quantitative measurement of respirable crystalline silica collected on filters inside respiratory equipment
Source: Royal Society of Chemistry journal article supplement (doi:10.1039/d0ay00165a), 2020-01-01

## Supplementary Information

An indirect Raman spectroscopy method for the quantitative measurement of respirable crystalline silica collected on filters inside respiratory equipment.

Peter Stacey, Francis Clegg, Jacqueline Morton and Christopher Sammon

Figure S1. An example of the proportion of particles leaking into a respirator for each size range measured by the miniWRAS instrument.

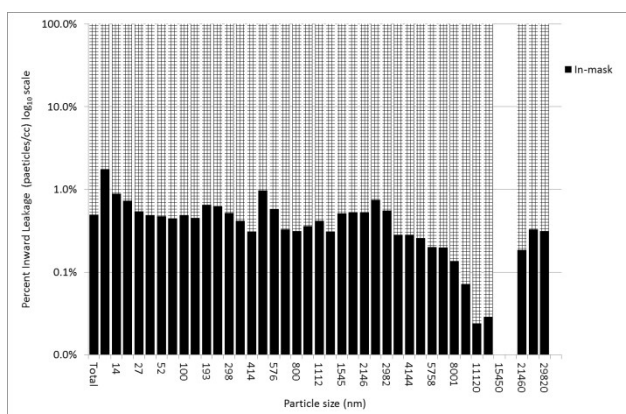

Figure S2: A comparison between the average response from a 5 mm deposit of NIST 1878a and the average response from a 10 mm deposit divided by the ratio of increase in deposit area.

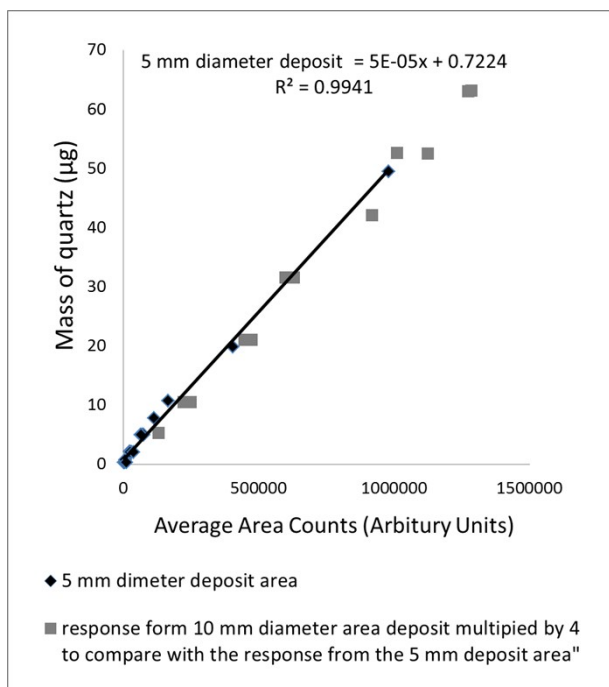

Figure S3. Comparability of Raman and XRD measurements when measuring respirable crystalline silica dust from the aerosol sampling filters and when the intercept is zero for both calibrations.

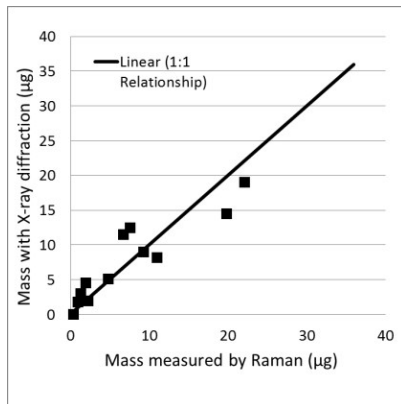

Supplement: d0ay00165a1.pdf [file d0ay00165a1.pdf]
